# Supplementary material for: Age-dependent and region-specific alteration of parvalbumin neurons, perineuronal nets and microglia in the mouse prefrontal cortex and hippocampus following obesogenic diet consumption
Source: PubMed Central journal article supplement (PMC7970944; doi:10.1038/s41598-021-85092-x), 2021-03-10
Supplement: 41598_2021_85092_MOESM1_ESM.pdf [file 41598_2021_85092_MOESM1_ESM.pdf]

Supplementary figures

**Age-dependent and region-specific alteration of parvalbumin neurons,  
perineuronal nets and microglia in the mouse prefrontal cortex and  
hippocampus following obesogenic diet consumption**

Amy C. Reichelt, Claire A. Lemieux, Oren Princz-Lebel, Ashmita Singh,

Timothy J. Bussey, Lisa M. Saksida

## Supplementary figures

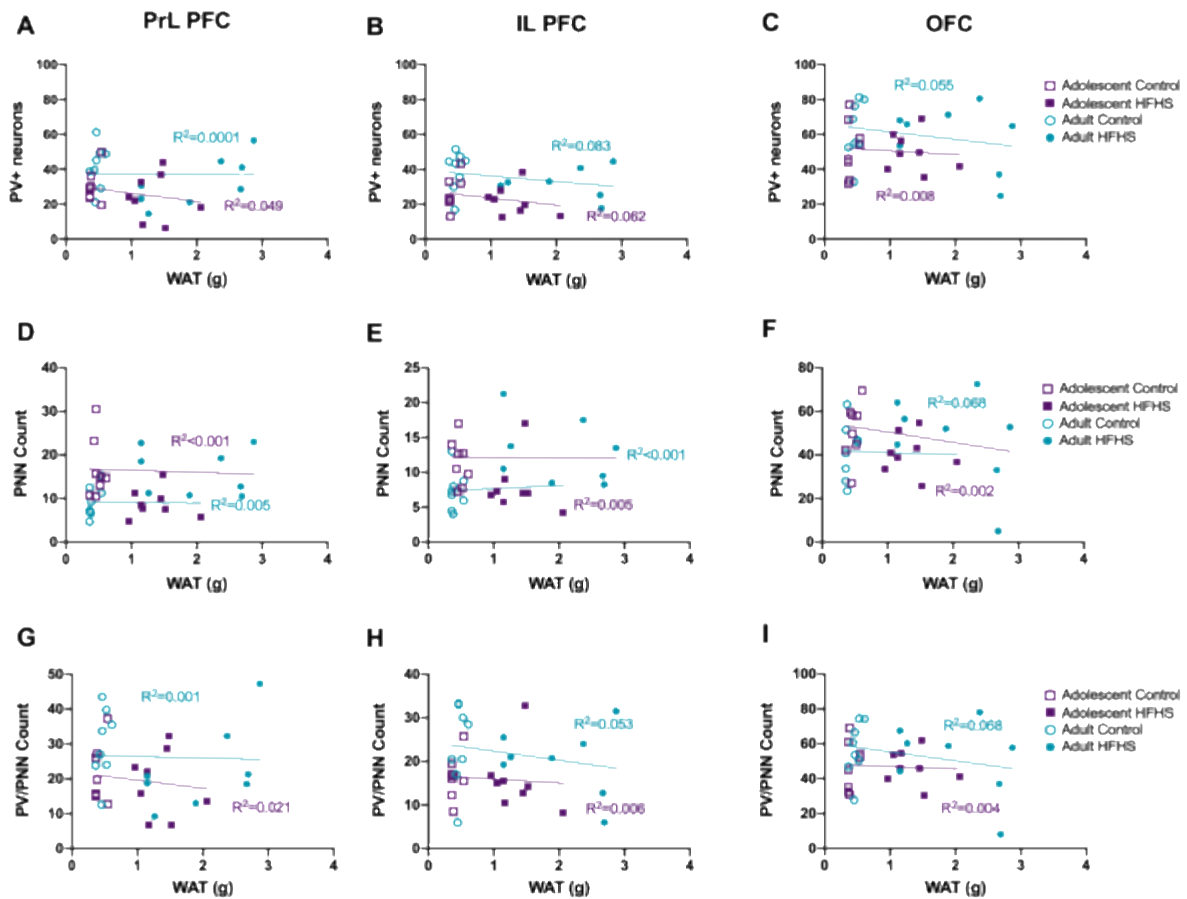

**Figure S1.** Linear regressions showing the association between PFC subregions (PrL, IL, OFC) PV+ neurons (A-C), WFA+ PNNs (D-F), PV/PNN colocalisation (G-I) and adiposity (white adipose tissue mass – WAT) in mice exposed to a HFHS diet across adolescence or as adults. R<sup>2</sup> values presented, \*p<0.05, \*\*p<0.01, \*\*\*p<0.001.

Supplementary figures

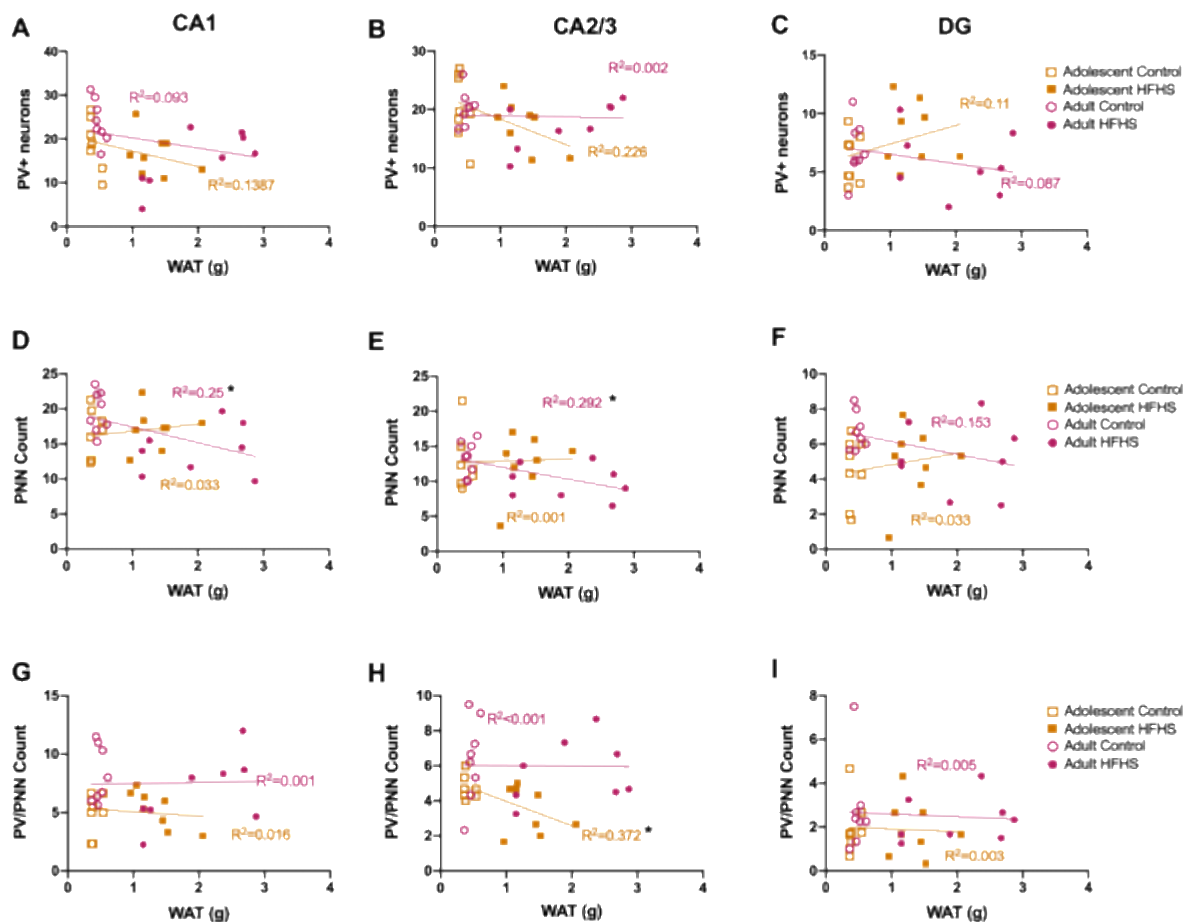

**Figure S2** - Linear regressions showing the association between hippocampal subregions (CA1, CA2/3, DG) PV+ neurons (A-C), WFA+ PNNs (D-F) and PV/PNN colocalisation (G-I) and adiposity (white adipose tissue mass – WAT) in mice exposed to a HFHS diet across adolescence or as adults. R<sup>2</sup> values presented, \*p<0.05, \*\*p<0.01, \*\*\*p<0.001.

## Supplementary figures

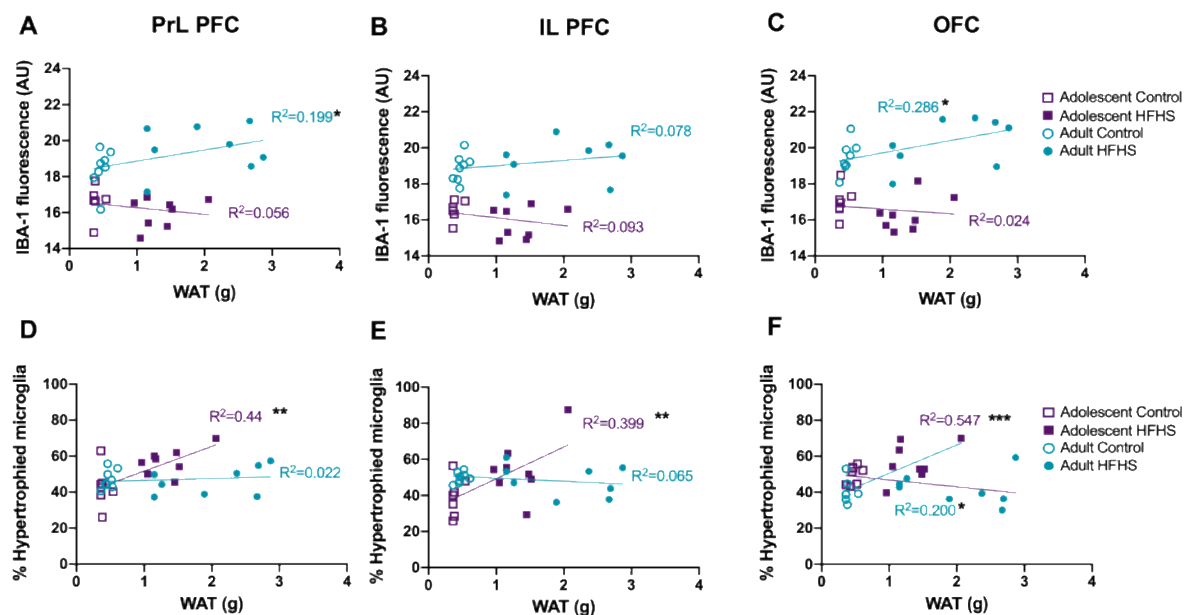

**Figure S3** - Linear regressions showing the association between PFC subregions (PrL, IL, OFC) IBA-1 fluorescence (A-C) and % hypertrophied microglia (D-F), and adiposity (white adipose tissue mass – WAT) in mice exposed to a HFHS diet across adolescence or as adults.  $R^2$  values presented, \* $p<0.05$ , \*\* $p<0.01$ , \*\*\* $p<0.001$ .

## Supplementary figures

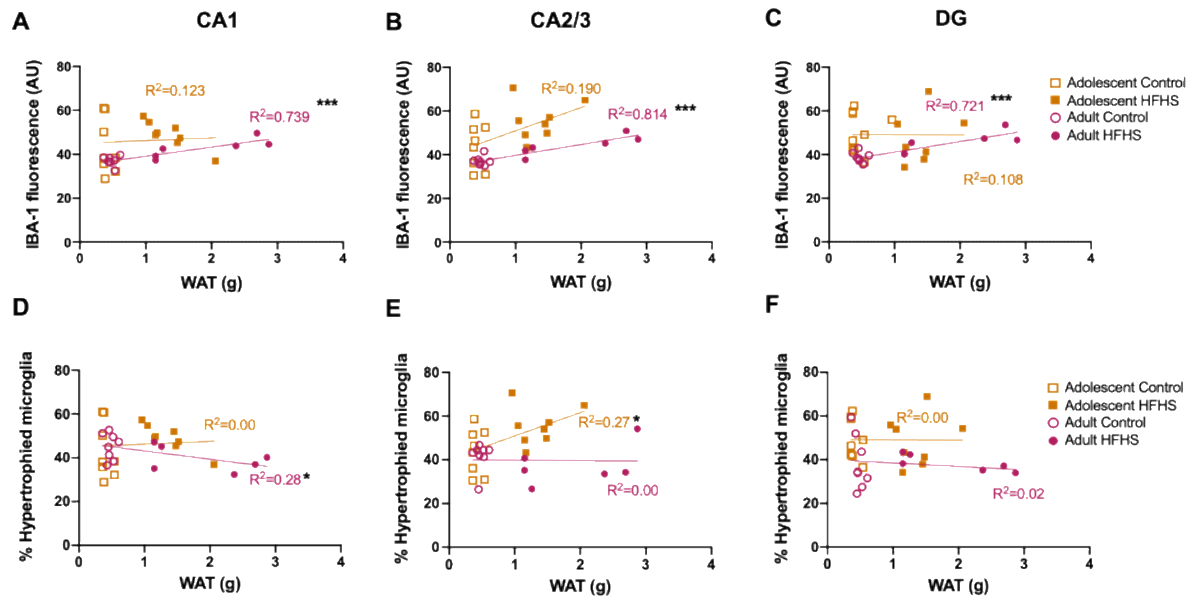

**Figure S4** - Linear regressions showing the association between hippocampal subregions (CA1, CA2/3, DG) IBA-1 fluorescence (A-C) and % hypertrophied microglia (D-F), and adiposity (white adipose tissue mass – WAT) in mice exposed to a HFHS diet across adolescence or as adults. R<sup>2</sup> values presented, \*p<0.05, \*\*p<0.01, \*\*\*p<0.001.

## Supplementary figures

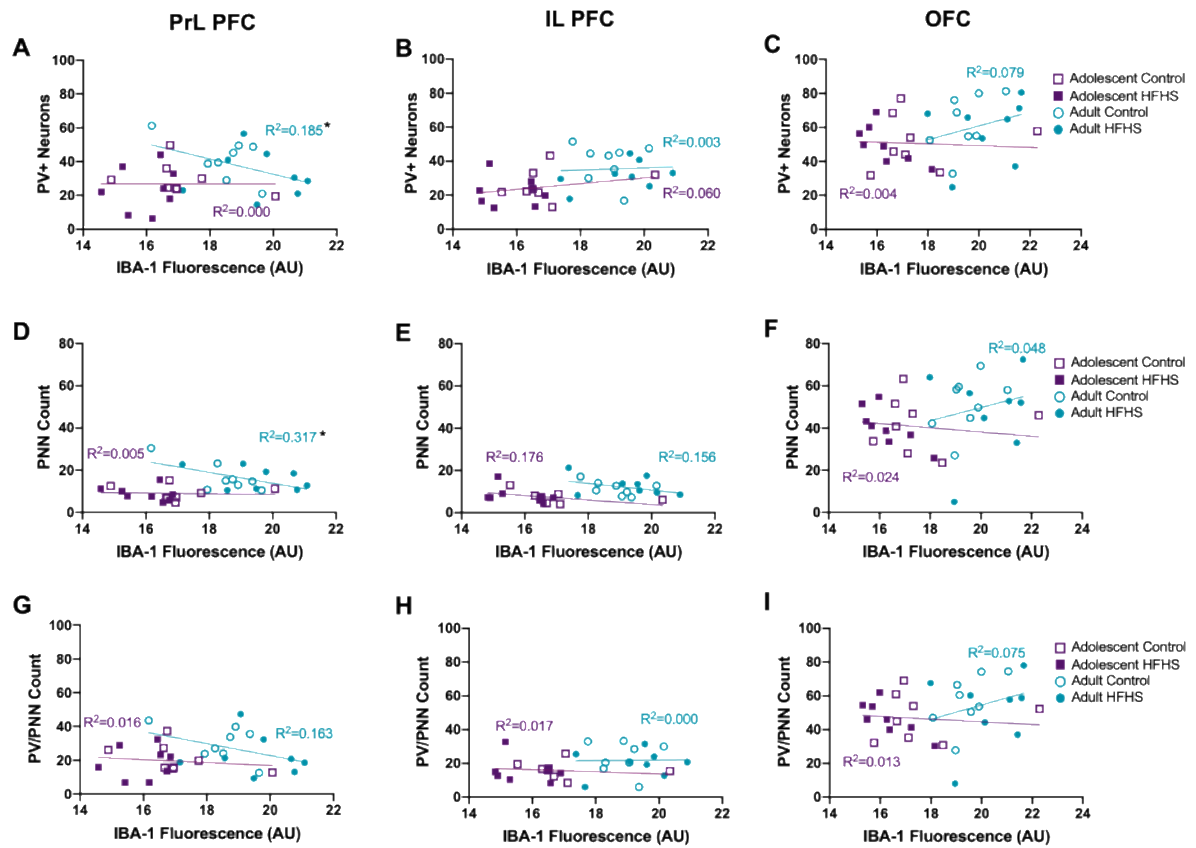

**Figure S5** - Linear regressions showing the association between PFC subregions (PrL, IL, OFC) PV+ neurons (A-C), WFA+ PNNs (D-F), PV/PNN colocalisation (G-I) and IBA-1 fluorescence in mice exposed to a HFHS diet across adolescence or as adults. R<sup>2</sup> values presented, \*p<0.05, \*\*p<0.01, \*\*\*p<0.001.

## Supplementary figures

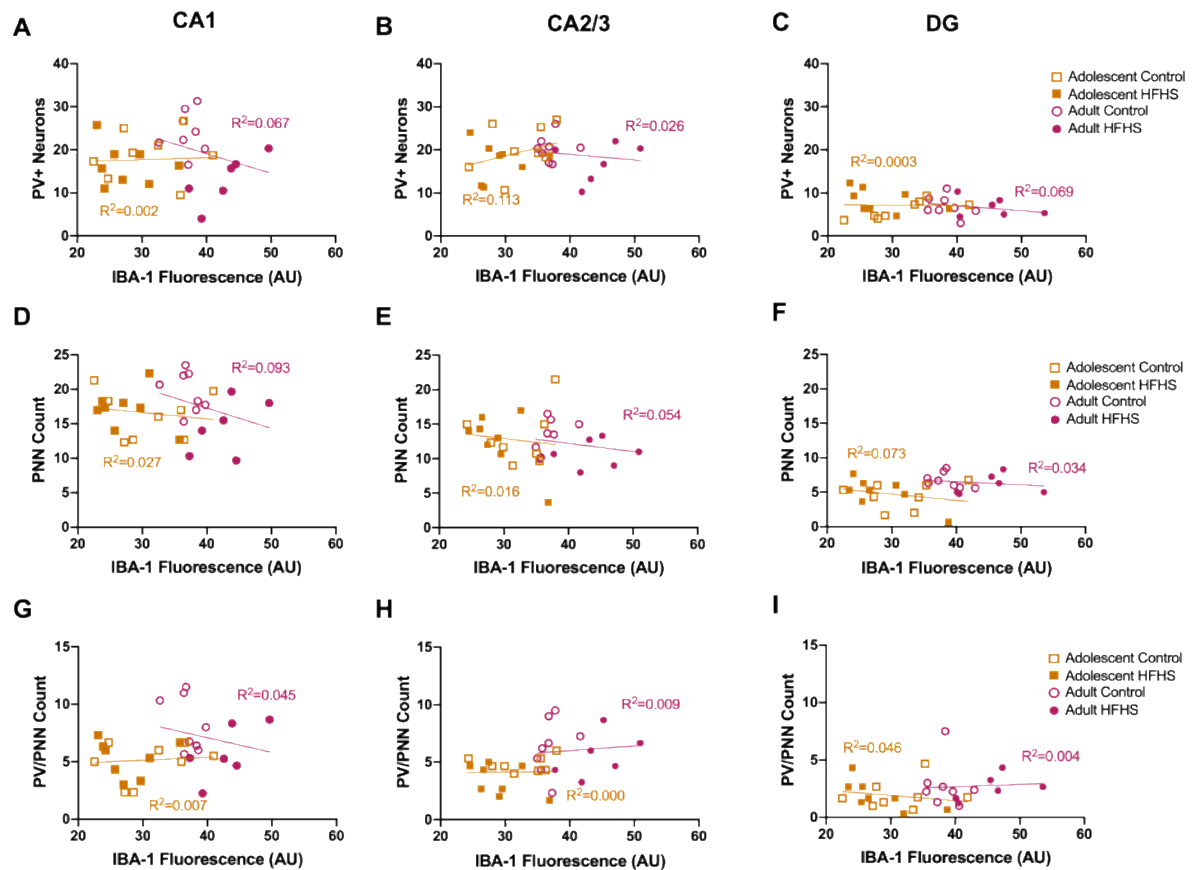

**Figure S6** - Linear regressions showing the association between hippocampal subregions (CA1, CA2/3, DG) PV+ neurons (A-C), WFA+ PNNs (D-F) and PV/PNN colocalisation (G-I) and IBA-1 fluorescence in mice exposed to a HFHS diet across adolescence or as adults.  $R^2$  values presented, \* $p < 0.05$ , \*\* $p < 0.01$ , \*\*\* $p < 0.001$ .
